# Supplementary material
Source: MDPI journal article supplement (https://www.mdpi.com/2571-6255/2/2/28)
Supplement: s1 [file s1]

## Supplementary materials

Pivovarov et al. The effect of ecophysiological traits on live fuel moisture content

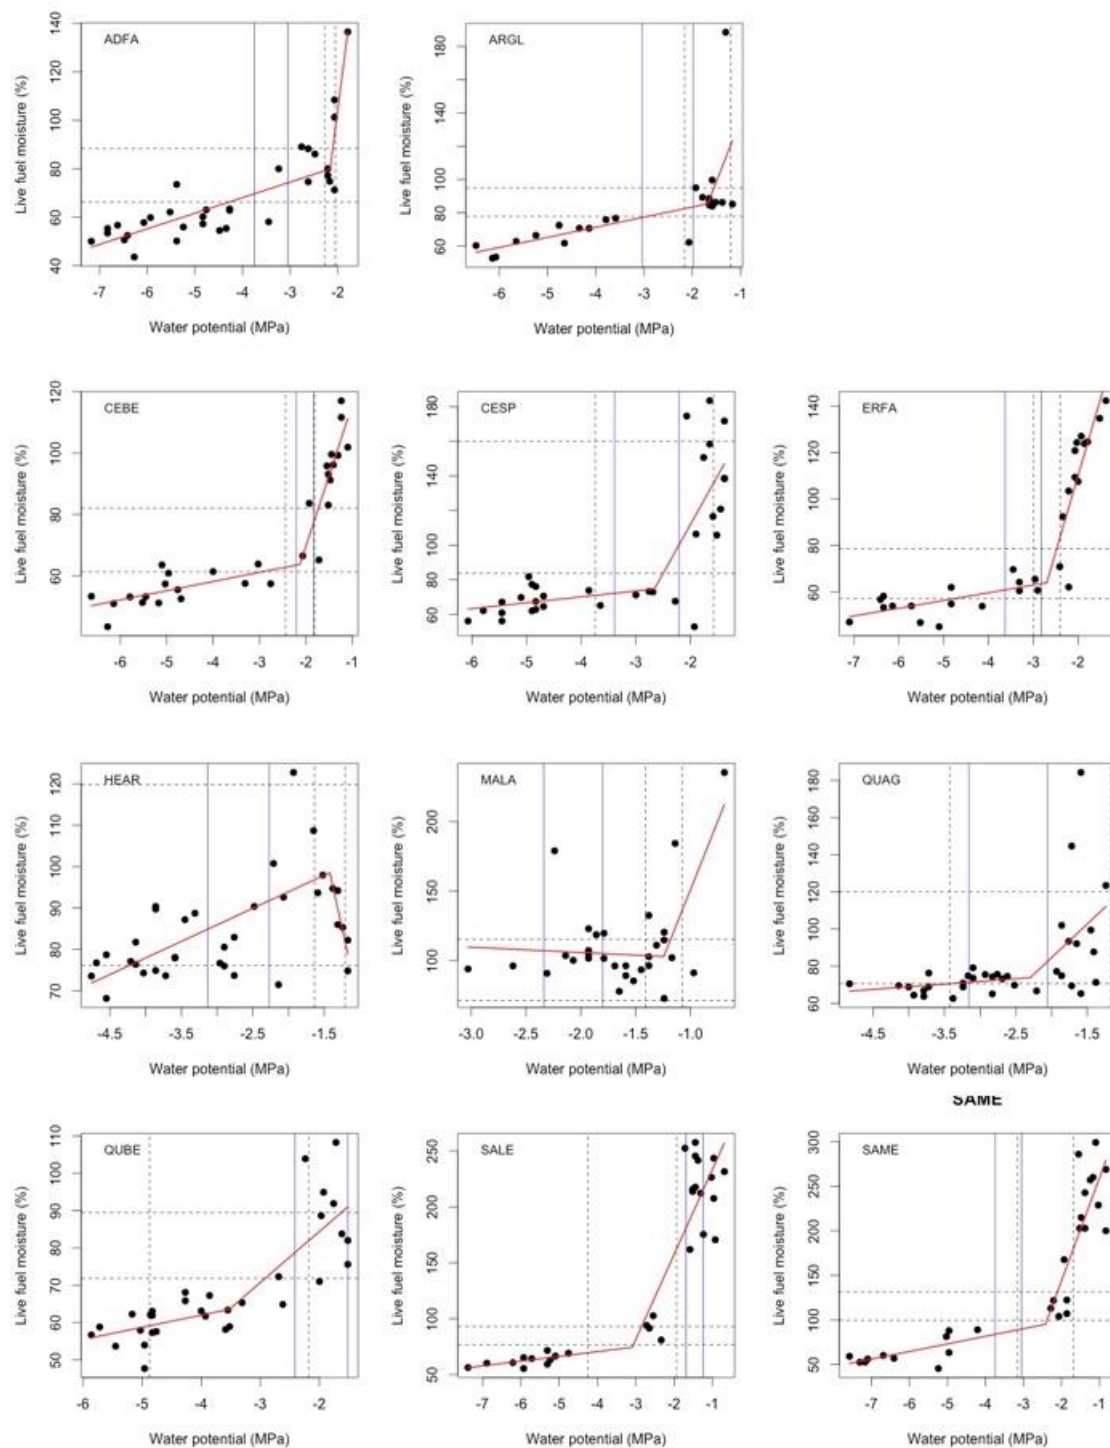

**Figure S1.** Water potential versus live fuel moisture content for 11 species, measured at the Stunt Ranch Santa Monica Mountains Reserve. Black points represent each measurement. Red lines represent the piecewise linear regression used to determine the inflection point. Blue lines represent the 95% confidence intervals for the turgor loss point. Dashed lines represent the 95% confidence intervals for the water potential and live fuel moisture inflection points. The four letter representation for each species name refers to the first two letters of the genus and first two letters of the species; full species names are found in Table 1.
